# Supplementary material for: Bone marrow-derived cells repopulate the human peritoneal cavity after allogeneic stem cell transplantation
Source: Research Square preprint supplement (doi:10.21203/rs.3.rs-8105536/v1), 2025-12-01
Supplement: Supplementary file 1 [file 539392ec3ffd3537949fc1c4.docx]

***Supplementary Material***

1. **Supplementary Figures**


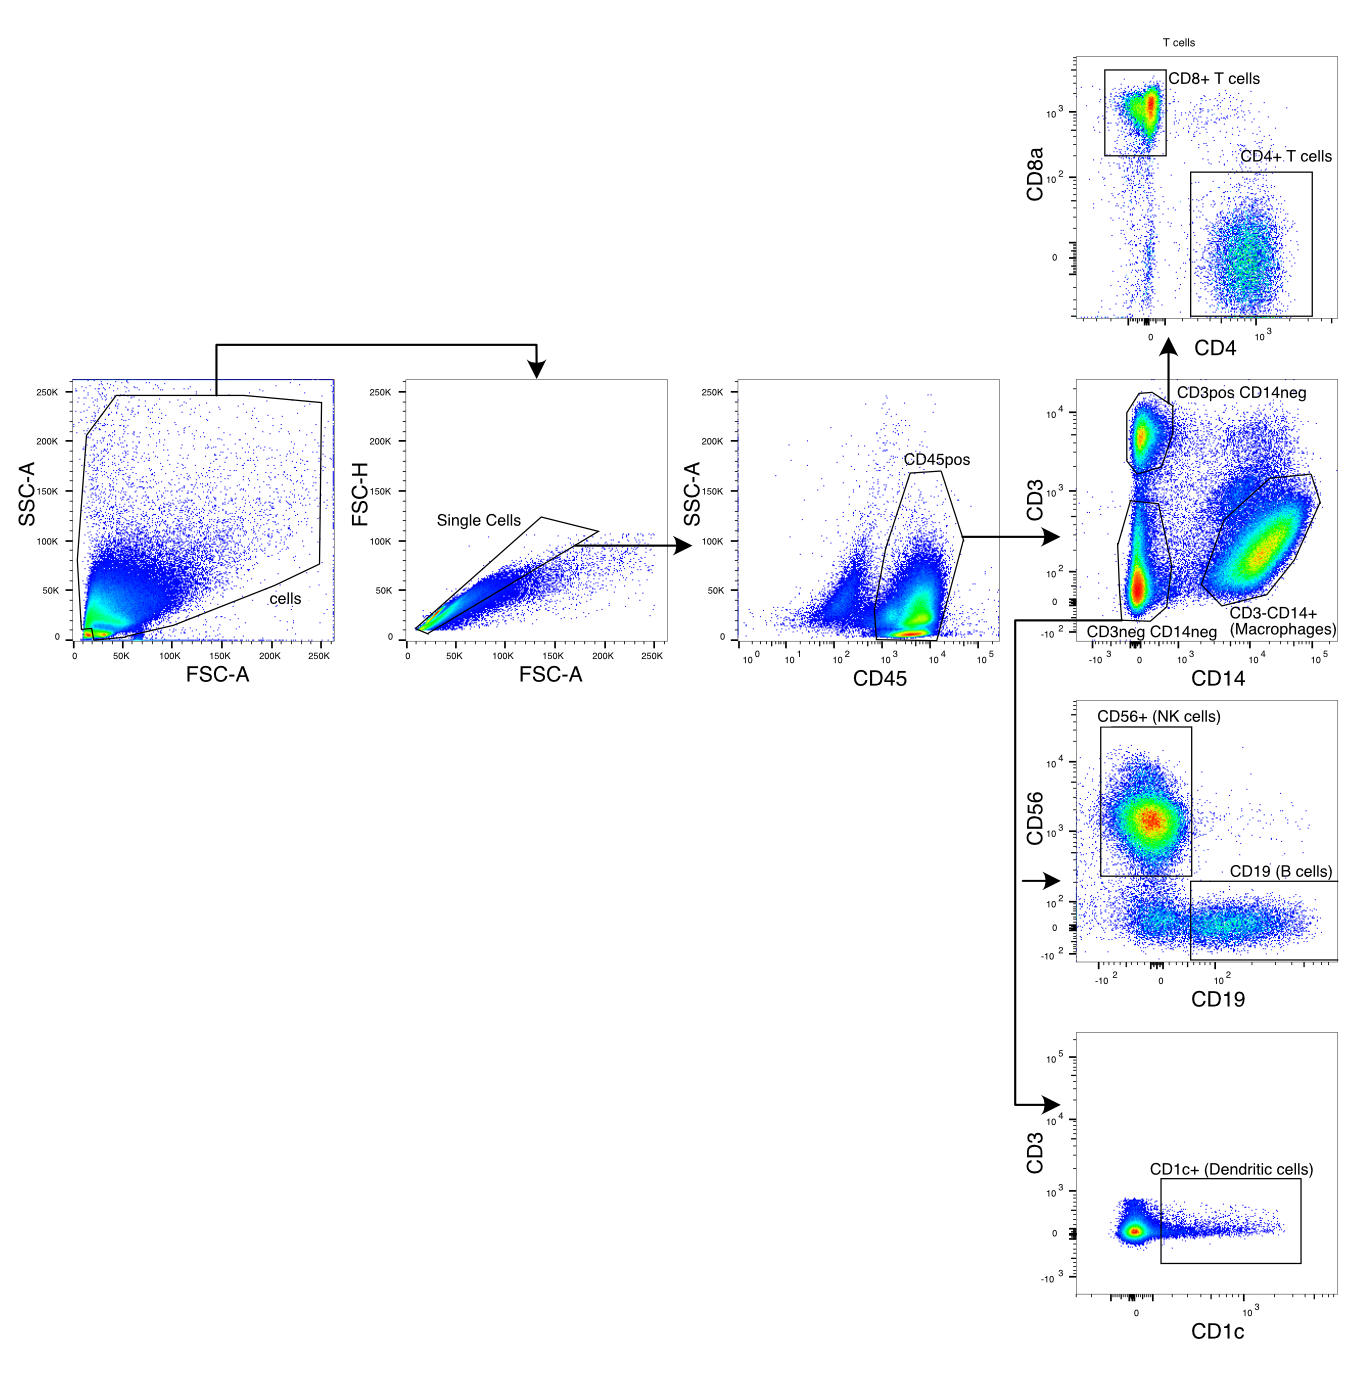


**Supplementary Figure 1.** **Gating Strategy for immuno-phenotyping of peritoneal leukocytes of patients with liver cirrhosis and ascites.** First, gating of cells, excluding debris, was performed. Then, cells were gated on single cells to remove duplicates. After that, CD45 positive cells were identified. By plotting CD14 expression vs. CD3 expression, macrophage (CD14+CD3-) and T cells (CD14-CD3+) could be identified. Cells within the CD14-CD3+ gate were further analysed for CD4 and CD8a expression to identify CD3+CD4+CD8- and CD3+CD4-CD8+ T cells. By gating on CD3-CD14- cells, B cells (CD19+CD56-), NK cells (CD19- CD56+) and Dendritic cells (CD3-CD1c+) could be quantified.

**
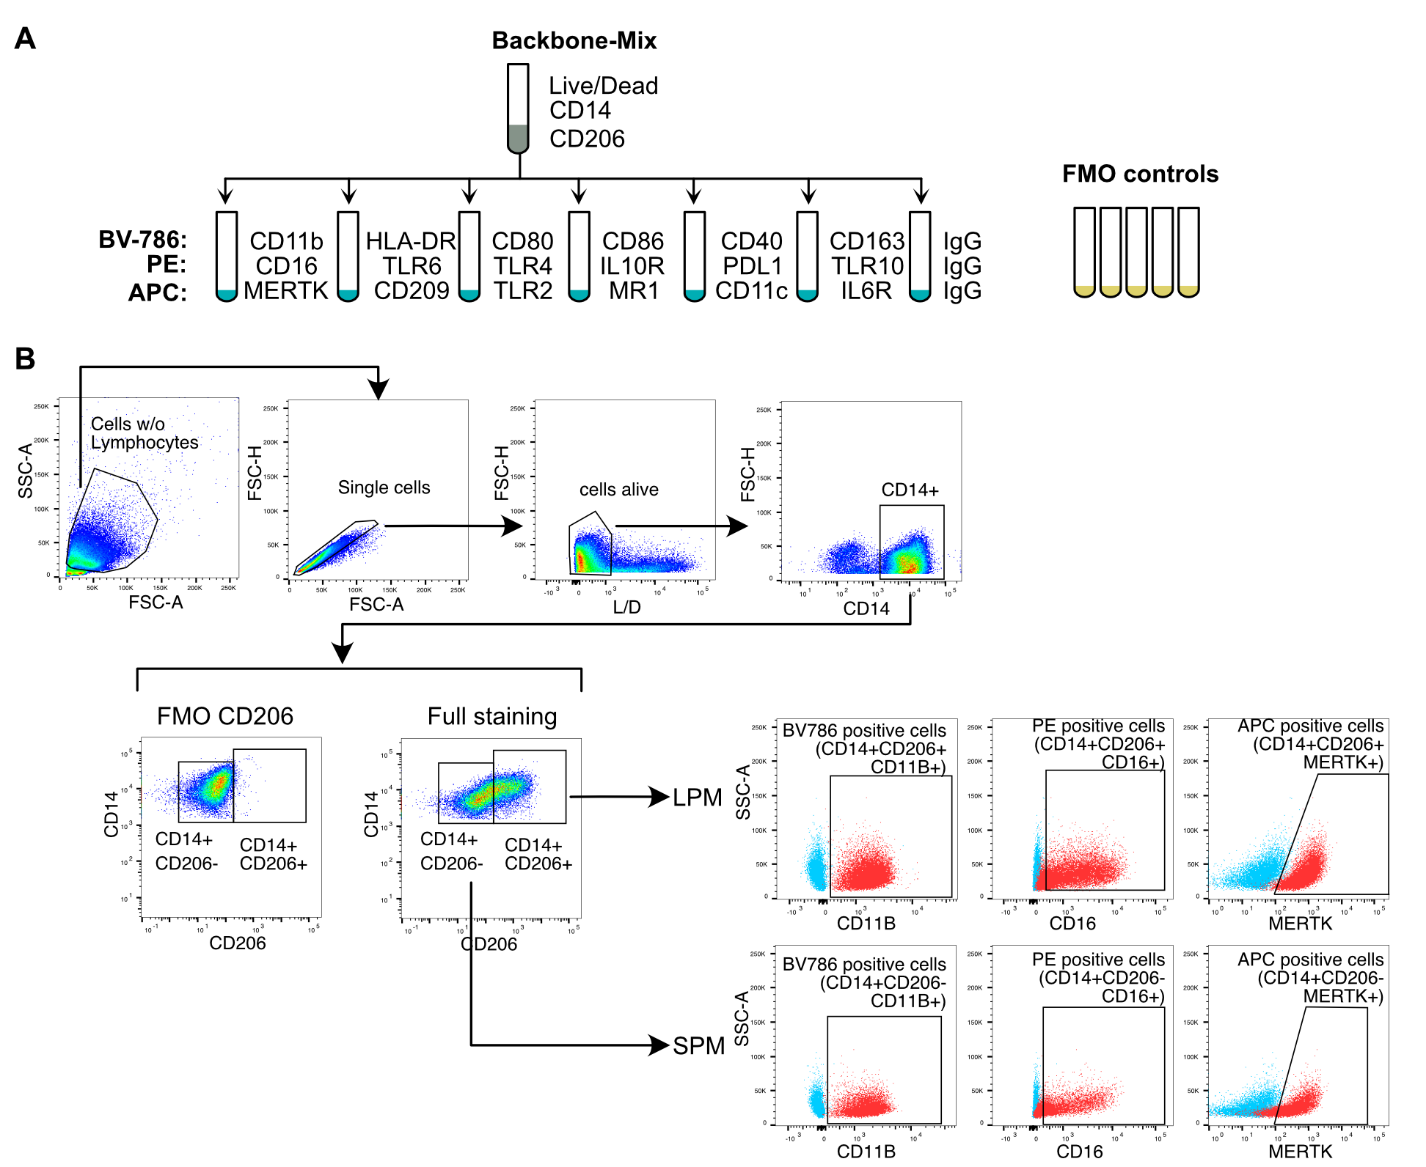
**

**Supplementary Figure 2. Gating Strategy for immuno-phenotyping of peritoneal macrophages of patients with liver cirrhosis and ascites.** **(A)** Staining strategy for macrophage phenotyping, to analyse macrophage marker expression on SPM and LPM. First, dead cells were stained with a fixable Live/Dead stain. Following, a master mix containing CD14 and CD206 antibodies was prepared and distributed to seven staining tubes containing antibodies against surface proteins and isotype controls. After that, Live/Dead stained cells were pipetted into staining tubes. In addition, cells were stained for FMO controls. **(B)** SPM and LPM were identified by gating on cells with the exclusion of lymphocytes, followed by gating on single cells, followed by gating on live cells, followed by gating on CD14 positive cells. Then, by the use of the CD206 FMO control, LPM and SPM were identified. Following, SPM and LPM were analysed for the expression of markers labeled with BV786, PE or APC conjugated antibodies (Blue population: Isotype control; Red population: Target antibody).


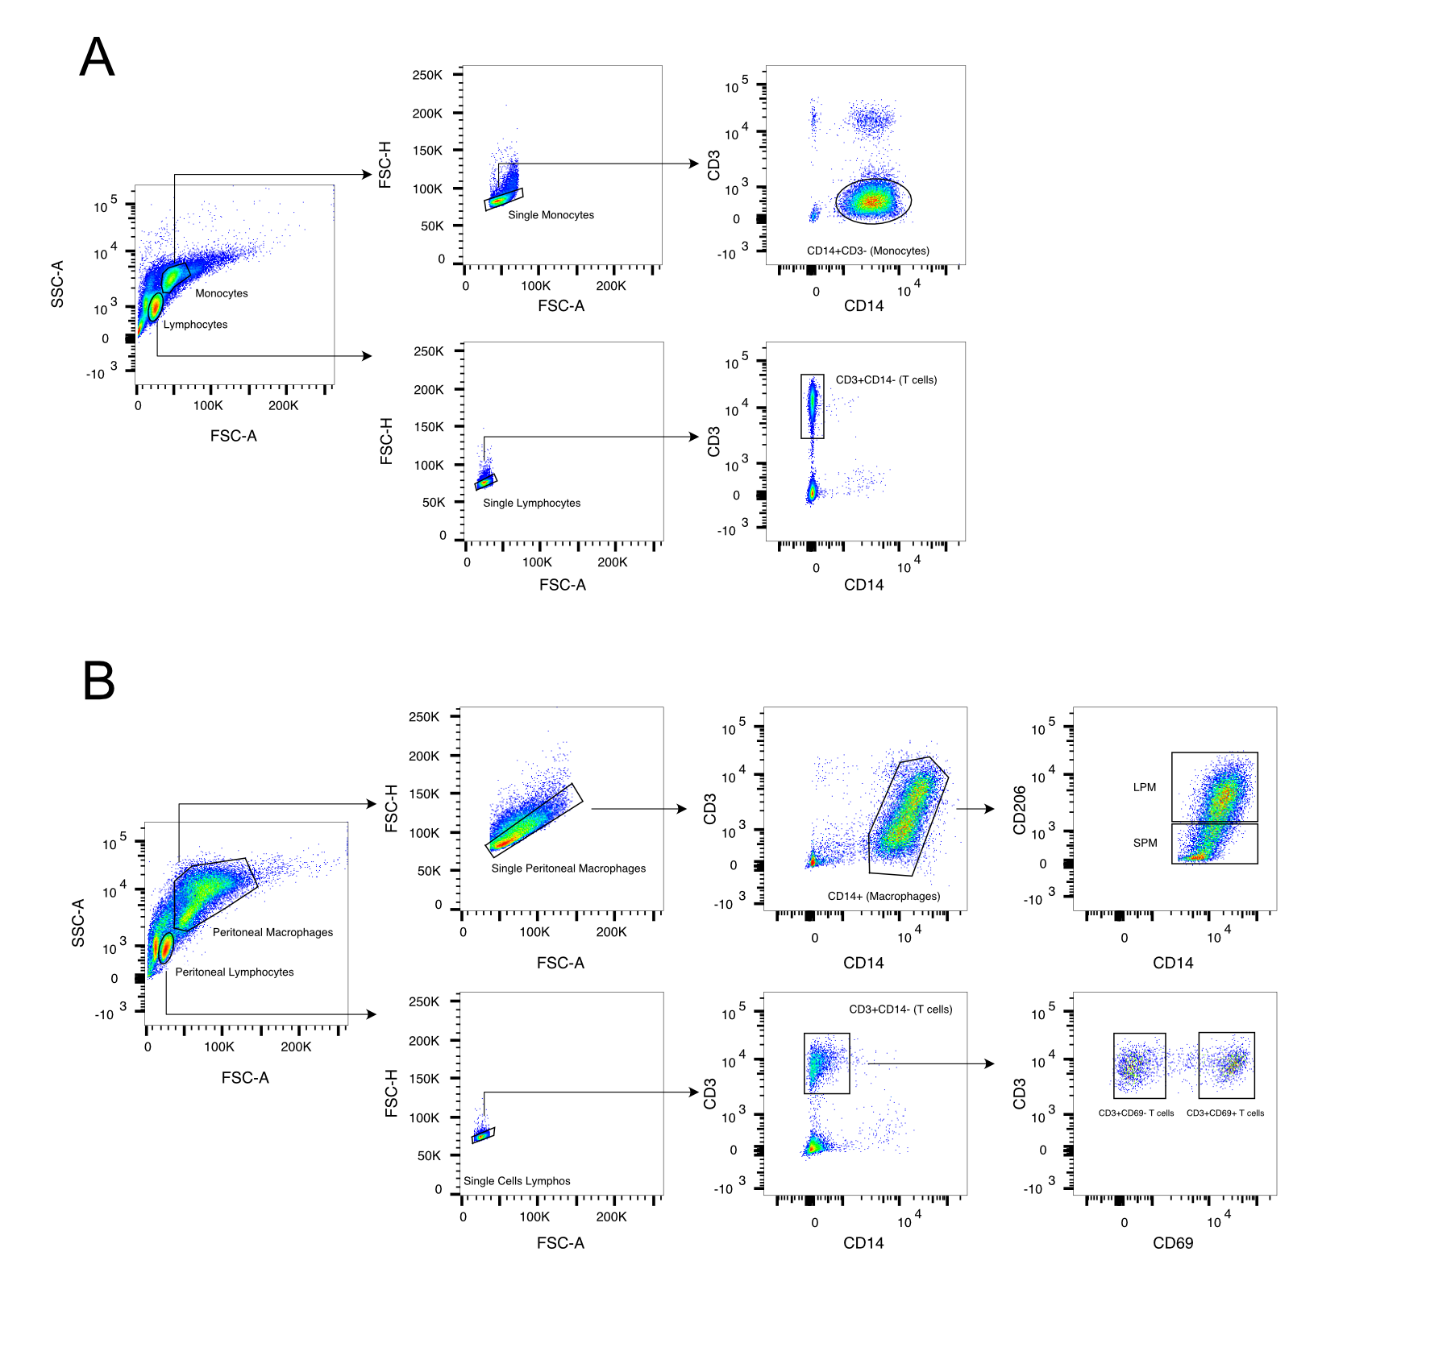


**Supplementary Figure 3. Gating Strategy for FACS Sorting of Patient cells for chimerism analysis.** **(A)** Sorting of T cells and monocytes from PBMC. PBMCs were isolated via density gradient centrifugation of whole blood and stained with CD3 and CD14 specific antibodies. Monocytes were isolated by first gating on the monocyte enriched population using FSC/SSC parameters, second gating on single cells, and last gating on CD3-CD14+ cells. T cells were isolated by first gating on the lymphocyte population using FSC/SSC parameters, second gating on single cells, and last gating on CD3+CD14- cells. **(B)** Sorting of CD69 T cell populations and peritoneal macrophages (SPM/LPM) from PAMC. PAMCs were isolated from ascitic fluid via density gradient centrifugation and stained with CD3, CD14, CD206 and CD69 specific antibodies. Macrophages were isolated by first gating on the macrophage population using FSC/SSC parameters, second gating on single cells, third gating on CD14+ cells and fourth gating on CD14+CD206- or CD14+CD206+ cells (SPM, respectively LPM). T cells were isolated by first gating on the lymphocyte population using FSC/SSC parameters, second gating on single cells, third gating on CD3+CD14- cells, and fourth gating on CD3+CD69- or CD3+CD69+ T cells.

1. **Supplementary Tables**

**Supplemental Table 1.** Clinical Characteristics of Patient Cohort and Chimeric Patient used for Peritoneal Immune Cell phenotyping

| **Characteristic** | **N** | **Data** |  | **Chimeric Patient** |
| --- | --- | --- | --- | --- |
| Age, y | 20 | 67 | (66-71) | **72** |
| Male sex | 20 | 16 | (80%) | **0** |
| Etiology of cirrhosis: | 20 |  |  |  |
| Alcoholic liver disease |  | 16 | (80%) | **1** |
| Viral (HBV) |  | 1 | (5%) |  |
| NASH |  | 1 | (5%) |  |
| Hämochromatose, Alcohol |  | 1 | (5%) |  |
| Other |  | 1 | (5%) |  |
| Child-Pugh score | 20 | 8 | (5-9) | **9** |
| MELD score | 20 | 14 | (12-19) | **17** |
| SBP  At time point of collection | 0 | 20 | 0% | **0** |
| Before time point of collection | 0 | 20 | 0% | **1** |
| AF leukocytes, x 10^3 / uL | 20 | 0.16 | (0.11-0.22) | **0.06** |
| AF PMN count, x 10^3 / uL | 20 | 0.01 | (0.01-0.03) | **0.01** |
| AF protein, g/L | 20 | 13 | (8-25) | **14.6** |
| Total serum bilirubin, umol/L | 20 | 27 | (13-40) | **11** |
| Serum albumin, g/L | 17 | 26 | (24-31) | **34** |
| International normalized ratio | 20 | 2 | (1.3-1.6) | **1.1** |
| Creatinine, umol/L | 20 | 98 | (78-124) | **234** |

**Supplemental Table 2.** Antibodies used for immuno-phenotyping of peritoneal leukocytes

| **Antigene** | **Dye** | **Clone** | **Company** | **Order Number** |
| --- | --- | --- | --- | --- |
| CD45 | BUV395 | HI30 | BD bioscience | 563792 |
| CD19 | BV605 | SJ25C1 | BD bioscience | 562653 |
| CD1c | PE | F10/21A3 | BD bioscience | 564900 |
| CD4 | BV480 | SK3 | BD bioscience | 566104 |
| CD8a | FITC | HIT8a | BioLegend | 300906 |
| CD3 | PE-CF594 | OKT3 | BioLegend | 317346 |
| CD56 | APC | 5.1H11 | BioLegend | 362504 |
| CD14 | Alexa700 | 63D3 | BioLegend | 367114 |

**Supplemental Table 3.** Antibodies used for immuno-phenotyping of peritoneal macrophages

|  | **Antigene** | **Dye** | **Clone** | **Company** | **Order Number** |
| --- | --- | --- | --- | --- | --- |
| Tubes 1-6 | CD14 | BV421 | HCD14 | BioLegend | 325628 |
|  | CD206 | BB515 | 19,2 | BD bioscience | 564668 |
| Tube 1 | HL-DR | BV785 | L243 | BioLegend | 307642 |
|  | TLR6 | PE | TLR6.127 | BioLegend | 334708 |
|  | CD209 | APC | 9E9A8 | BioLegend | 330108 |
| Tube 2 | CD11B | BV785 | ICRF44 | BioLegend | 301346 |
|  | CD16 | PE | B73.1 | BioLegend | 360704 |
|  | MERTK | APC | 590H11G1E3 | BioLegend | 367612 |
| Tube 3 | CD80 | BV785 | 2D10 | BioLegend | 305238 |
|  | TLR4 | PE | HTA125 | BioLegend | 312806 |
|  | TLR2 | APC | TL2.1 | BioLegend | 309720 |
| Tube 4 | CD86 | BV785 | IT2.2 | BioLegend | 305442 |
|  | IL10R | PE | 3F9 | BioLegend | 308804 |
|  | MR1 | APC | 8F2.F9 | BioLegend | 396104 |
| Tube 5 | CD40 | BV785 | 5C3 | BioLegend | 334340 |
|  | PDL1 | PE | MIH2 | BioLegend | 393608 |
|  | CD11C | APC | 3.9 | BioLegend | 301614 |
| Tube 6 | CD163 | BV785 | GHI/61 | BioLegend | 333632 |
|  | TLR10 | PE | 3C10C5 | BioLegend | 354604 |
|  | IL6R | APC | UV4 | BioLegend | 352806 |

**Supplemental Table 4.** Antibodies used for cell sorting

| **Antigene** | **Dye** | **Clone** | **Company** | **Order Number** |
| --- | --- | --- | --- | --- |
| CD14 | BV421 | HCD14 | BioLegend | 325628 |
| CD206 | APC | 19.2 | BD bioscience | 550889 |
| CD3 | BV785 | OKT3 | BioLegend | 317329 |
| CD69 | PE | REA824 | Miltenyi Biotec | 130-112-802 |

1. **Supplementary Chimeric Patient data**

Case: A 72-year-old female patient who had received an allogeneic stem cell transplant due to myelodysplastic syndrome (high-risk, EB2). The transplant was from a male HLA-identical unrelated donor (with a blood group change) after conditioning with fludarabine and treosulfan. During the course, liver cirrhosis was also diagnosed, with new-onset jaundice occurring during high-dose chemotherapy.

Two hundred seventy days after transplantation, the patient developed ascites and spontaneous bacterial peritonitis, with E. coli detected in the ascitic punctate. About two months later, the patient presented again to the emergency department with esophageal variceal bleeding and significant portal hypertension (HVPG 18 mmHg). After paracentesis, cells from the ascitic fluid and peripheral blood were isolated and processed and stored in our research laboratory (day 342). About two weeks later, the patient underwent TIPS implantation.

Due to the suspicion of veno-occlusive disease, or rather sinusoidal obstruction syndrome, after hematopoietic stem cell transplantation, a transjugular liver biopsy was performed, revealing nutritive-toxic damage with a history of alcohol consumption. On day 371 after transplantation, another SBP caused by Enterococcus faecalis occurred, presenting with sepsis and subsequent acute-on-chronic liver failure, whereupon the patient died on day 395 after transplantation.
